# Supplementary material for: INFLECT: an R-package for cytometry cluster evaluation using marker modality
Source: BMC Bioinformatics. 2022 Nov 16;23:487. doi: 10.1186/s12859-022-05018-w (PMC9670405; doi:10.1186/s12859-022-05018-w)
Supplement: Supplementary file 3 — Additional file 3: Matching matrix of Bagwell dataset. [file 12859_2022_5018_MOESM3_ESM.csv]

	1	2	3	4	5	6	7	8	9	10	11	12	13	14	15	16	17	18	19	20	21	22	23	24	25	26	27	28	29	30	31	32	33	34	35	36	37	38	39	40	41
CD123+ HLADR+ pDCs.fcs	0	0	0	0	0	0	0	0	0	0	0	0	1	0	0	0	0	1	24	0	0	0	0	0	123	0	0	0	0	0	0	0	0	0	7276	5	6	0	0	0	0
CD19 CD20+ B Cells	0	0	0	0	0	0	0	0	25	2	0	4	12	0	0	0	2	1117	2	0	584	14546	0	255	1075	0	41986	12943	0	1	29272	17129	18124	24851	1	274	471	20041	7080	0	0
CD38+ CD123+ HLADCneg Basophils.fcs	0	0	0	0	0	0	0	0	0	0	0	0	0	0	0	0	0	32	8925	0	26	0	0	0	0	0	0	0	0	0	0	0	0	0	0	6	0	0	0	0	0
CD4 T Cells.fcs	1279	13233	75469	31549	239	30	0	267	0	1	26	65	1	44887	15097	270	63	0	0	25915	27	0	10388	115	11	0	2	0	0	2892	0	0	0	0	0	0	0	0	0	0	0
CD4neg T Cells.fcs	4	53	456	1737	41578	440	27	17232	109	63	23343	12459	232	0	286	22236	5954	40	0	0	84	24	316	1647	2	0	18	0	0	24	0	0	23	0	0	0	16	0	0	0	0
CD56+ NK.fcs	0	0	1	351	65	31847	7170	226	35720	22291	0	1282	15248	0	0	68	2	4474	2	0	4518	742	3	1105	780	1	1447	0	4	0	1	0	65	0	1	33	482	1	2	0	0
cDCs.fcs	0	0	0	0	0	0	0	0	0	0	0	1	0	0	0	0	0	0	0	0	0	294	0	2	1422	0	1662	1	25	2	0	0	913	13	22	1147	9323	0	0	3525	135
Classical Monocytes CD14+	0	0	0	0	0	0	1	0	1	0	0	6	14	0	0	0	0	2577	5	0	15391	255	1	5	11978	17221	959	0	29042	0	2	0	16	0	0	160	474	0	0	61	2075
Non-Classical Monocytes CD16+	0	0	0	0	0	0	0	0	0	0	0	1	0	0	0	0	0	16	0	0	1180	1	0	1	1150	5	325	0	266	0	0	0	11	0	8	9271	75	0	0	3	1
