# Supplementary material for: INFLECT: an R-package for cytometry cluster evaluation using marker modality
Source: BMC Bioinformatics. 2022 Nov 16;23:487. doi: 10.1186/s12859-022-05018-w (PMC9670405; doi:10.1186/s12859-022-05018-w)
Supplement: Supplementary file 5 — Additional file 5: Matching matrix of Kimmey-PBMC dataset. [file 12859_2022_5018_MOESM5_ESM.csv]

	Basophils.fcs	CD4_Central_Memory.fcs	CD4_Effector_Memory.fcs	CD4_Naive.fcs	CD4_Terminal_Effector.fcs	CD8_Central_Memory.fcs	CD8_Effector_Memory.fcs	CD8_Naive.fcs	CD8_Terminal_Effector.fcs	Classical_Monocytes.fcs	Double label.fcs	Early_NKs.fcs	Gd_T_Cells.fcs	Late_NKs.fcs	MAIT_NKT.fcs	mDC.fcs	Naive_B_Cells.fcs	Neutrophils.fcs	Non-Classical_Monocytes.fcs	pDC.fcs	Plasmablasts.fcs	Th1-like.fcs	Th17-like.fcs	Th2-like.fcs	Total_Memory_B_Cells.fcs	Transitional�_Monocytes.fcs	Treg	Unknown
1	0	0	0	2	0	13	405	12847	0	0	1	0	0	0	7	0	0	0	0	0	0	0	0	0	0	0	0	356
2	0	0	0	0	0	336	2364	106	14	0	25	0	1	0	19	0	0	0	0	0	0	0	0	0	0	0	0	208
3	0	0	1	0	0	5	1224	0	21	0	7	0	1	0	7	0	0	0	0	0	0	0	0	0	0	0	0	102
4	0	0	195	0	1492	0	0	0	0	0	13	0	0	0	0	0	0	0	0	0	0	222	11	32	0	0	3	114
5	0	0	0	0	0	0	841	0	2676	0	23	0	2	0	0	0	0	0	0	0	0	0	0	0	0	0	0	241
6	0	0	0	0	0	0	49	0	136	0	1	0	27	6	1	0	0	0	0	0	0	0	0	0	0	0	0	1302
7	0	0	0	0	0	0	0	0	0	0	27	0	0	11030	0	1	0	2	0	0	0	0	0	0	0	0	0	3850
8	0	0	0	0	0	0	0	0	0	0	1	0	0	3	0	0	2	0	0	0	0	0	0	0	0	0	0	17
9	0	0	0	0	0	0	0	0	0	0	0	0	0	0	0	0	13309	2	0	0	1	0	0	0	74	0	0	317
10	0	0	0	0	0	5	1471	1	161	0	15	1	1	0	48	0	0	0	0	0	0	0	0	0	2	0	0	146
11	0	0	0	0	0	34	625	0	432	0	83	0	0	0	98	0	0	0	0	0	0	1	0	0	0	0	0	103
12	0	0	0	0	1	0	0	0	0	0	84	0	0	953	0	0	0	1	0	0	0	0	0	0	0	0	0	453
13	0	0	0	1	0	0	0	2	0	0	16	0	751	1	2	0	0	0	0	0	0	0	0	0	0	0	0	284
14	0	0	0	0	0	0	0	0	0	0	19	0	1	5843	0	0	0	1	0	0	0	0	0	0	0	0	0	765
15	0	0	0	0	0	0	0	0	0	0	0	0	1	0	0	0	1519	0	0	0	0	0	0	0	2318	0	0	233
16	0	0	4	3	0	0	10	0	0	0	1	0	499	0	9	0	0	0	0	0	0	0	0	0	0	0	0	882
17	0	0	1	0	0	0	0	0	0	0	207	0	2235	0	18	0	0	0	0	0	0	0	0	0	0	0	0	283
18	0	0	0	0	0	0	0	0	0	0	2594	0	3268	0	59	0	0	0	0	0	0	0	0	0	0	0	0	228
19	0	0	0	0	0	0	32	44	0	0	0	0	4	0	0	0	0	0	0	0	0	0	0	0	0	0	0	200
20	0	0	0	0	0	0	0	0	0	0	294	0	5	0	2259	0	0	0	0	0	0	0	0	0	0	0	0	72
21	0	0	10	0	0	1	60	0	31	0	82	1	3	0	7169	0	0	0	0	0	0	0	0	0	0	0	0	224
22	0	0	0	0	0	0	0	0	0	0	0	2	0	0	0	0	15	0	0	0	104	0	0	0	18	0	0	34
23	0	450	28	24820	0	0	0	0	0	0	20	0	1	0	0	0	0	2	0	0	0	3	0	0	0	0	0	2368
24	0	0	0	0	0	0	0	0	1	0	47	5031	0	729	0	2	0	0	0	0	0	0	0	0	0	0	0	884
25	0	0	0	0	0	0	0	0	0	0	24	0	0	0	0	1	68	0	0	356	0	0	0	0	1	0	0	26
26	0	435	460	935	1	1	0	0	0	0	34	0	2	0	0	0	0	0	0	0	0	45	0	10	0	0	27	1054
27	0	15	201	3	138	4	7	4	5	0	34	0	14	0	2	0	1	2	0	0	0	12	21	53	0	0	7	482
28	0	0	3	0	2	0	1	0	3	0	56	3	27	0	1077	0	0	0	0	0	0	0	0	0	0	0	0	636
29	0	0	0	0	0	0	0	0	0	0	12	429	0	21	0	13	0	0	0	0	0	0	0	0	0	0	0	1106
30	0	0	0	0	0	0	0	0	0	2	3	1	0	0	0	0	0	0	84	0	0	0	0	0	0	53	0	47
31	0	0	0	0	0	0	0	0	0	4	141	1	0	1	0	13	203	0	4233	0	0	0	0	0	3	990	0	246
32	0	213	957	0	54	1	0	0	0	0	147	0	0	0	0	0	0	0	0	0	0	478	119	819	0	0	189	140
33	0	130	4365	0	0	0	0	0	0	0	1	0	0	0	0	0	0	0	0	0	0	1636	398	32	0	0	0	130
34	0	0	530	0	584	0	0	0	0	0	2	0	0	0	1	0	0	0	0	0	0	50	3	2	0	0	0	120
35	0	759	3529	0	0	0	0	0	0	0	25	0	0	0	0	0	0	0	0	0	0	1354	16	289	0	0	0	188
36	0	0	0	0	1	0	1	0	0	0	1	0	2	0	0	0	1	0	0	0	0	0	0	0	0	0	0	954
37	583	0	0	0	0	0	0	0	0	0	1	0	0	0	0	0	0	0	0	0	0	0	0	0	0	0	0	53
38	0	0	0	0	0	0	0	0	0	176	4	0	0	0	0	898	0	0	0	1	0	0	0	0	0	1	0	366
39	3	0	0	0	0	0	0	0	0	137	1	1	0	0	0	0	0	1	26	0	1	0	0	0	0	171	0	163
40	0	1061	421	487	2	1	0	4	0	0	24	0	1	0	0	0	0	0	0	0	0	430	8	7	0	0	2	469
41	0	2	112	0	1600	0	0	0	0	0	22	0	0	0	0	0	0	0	0	0	0	94	16	0	0	0	0	45
42	0	0	0	0	0	0	0	0	0	734	2	0	0	0	0	1	0	0	4	0	0	0	0	0	0	263	0	280
43	0	0	0	0	0	0	0	0	0	1941	37	0	0	0	0	6	0	0	52	0	0	0	0	0	0	2478	0	85
44	0	0	0	0	0	0	0	0	0	2	0	0	0	0	0	0	0	219	0	0	0	0	0	0	0	0	0	15
45	0	0	0	0	0	0	0	0	0	16478	0	0	0	0	0	0	0	0	0	0	0	0	0	0	0	15	0	1655
46	0	12	137	0	39	0	0	0	1	0	93	0	0	0	1	0	0	0	0	0	0	21	236	359	0	0	1109	53
47	0	3	36	1	461	0	0	0	0	0	1051	0	0	0	1	0	0	0	0	0	0	25	692	144	0	0	6	143
48	0	0	0	0	0	0	0	0	0	4448	1	0	0	0	0	0	0	0	0	0	0	0	0	0	0	15	0	55
49	0	167	629	28	2	0	0	0	0	0	634	0	0	0	1	0	0	0	0	0	0	1	1032	2946	0	0	4	189
50	0	0	0	0	0	0	0	0	0	40	0	0	0	0	0	0	0	0	1	0	0	0	0	0	0	6	0	34
51	0	0	0	0	0	0	0	0	0	5	0	0	0	0	0	0	0	4	0	0	0	0	0	0	0	0	0	94
52	0	1431	1126	5	1	0	0	0	0	0	23	0	0	0	0	0	0	0	0	0	0	4	30	25	0	0	0	48
